# T-box genes coordinate regional rates of proliferation and regional specification during cardiogenesis

Chen-Leng Cai<sup>1,2</sup>, Wenlai Zhou<sup>3</sup>, Lei Yang<sup>1,2,\*</sup>, Lei Bu<sup>1,2,\*</sup>, Yibing Qyang<sup>2,\*</sup>, Xiaoxue Zhang<sup>1,2</sup>, Xiaodong Li<sup>2</sup>, Michael G. Rosenfeld<sup>3</sup>, Ju Chen<sup>2</sup> and Sylvia Evans<sup>1,2,†</sup>

<sup>1</sup>Skaggs School of Pharmacy, University of California, San Diego, 9500 Gilman Drive, La Jolla, CA 92093, USA

<sup>2</sup>Department of Medicine, University of California, San Diego, 9500 Gilman Drive, La Jolla, CA 92093, USA

<sup>3</sup>Department of Medicine and Howard Hughes Medical Institute, University of California, San Diego, 9500 Gilman Drive, La Jolla, CA 92093, USA

\*These authors contributed equally to this work

†Author for correspondence (e-mail: syevans@ucsd.edu)

Accepted 22 March 2005

Development 132, 2475-2487

Published by The Company of Biologists 2005

doi:10.1242/dev.01832

## Summary

Mutations in T-box genes are the cause of several congenital diseases and are implicated in cancer. *Tbx20*-null mice exhibit severely hypoplastic hearts and express *Tbx2*, which is normally restricted to outflow tract and atrioventricular canal, throughout the heart. *Tbx20* mutant hearts closely resemble those seen in mice overexpressing *Tbx2* in myocardium, suggesting that upregulation of *Tbx2* can largely account for the cardiac phenotype in *Tbx20*-null mice. We provide evidence that *Tbx2* is a direct target for repression by *Tbx20* in developing heart. We have also found that *Tbx2* directly binds to the *Nmyc1* promoter in developing heart, and can repress expression of the *Nmyc1* promoter in transient transfection studies. Repression of *Nmyc1* (N-myc) by aberrantly regulated *Tbx2* can account in part for the observed cardiac hypoplasia in *Tbx20* mutants. *Nmyc1* is required for growth and development of multiple organs, including the heart, and overexpression of *Nmyc1* is associated with childhood tumors. Despite its

clinical relevance, the factors that regulate *Nmyc1* expression during development are unknown. Our data present a paradigm by which T-box proteins regulate regional differences in *Nmyc1* expression and proliferation to effect organ morphogenesis. We present a model whereby *Tbx2* directly represses *Nmyc1* in outflow tract and atrioventricular canal of the developing heart, resulting in relatively low proliferation. In chamber myocardium, *Tbx20* represses *Tbx2*, preventing repression of *Nmyc1* and resulting in relatively high proliferation. In addition to its role in regulating regional proliferation, we have found that *Tbx20* regulates expression of a number of genes that specify regional identity within the heart, thereby coordinating these two important aspects of organ development.

Key words: T-box, *Tbx20*, Heart development, Proliferation, *Nmyc1* (N-myc)

## Introduction

T-box (Tbx) transcription factors are highly conserved across species, expressed in a wide variety of tissue types, often in an overlapping manner, and are required for development of diverse organs and tissues (Kiefer, 2004). T-box genes regulate patterning and cell fate, cell survival and/or proliferation, and are also of great clinical relevance. Mutations in T-box genes are the cause of a number of human disorders (Packham and Brook, 2003), including ulnar-mammary syndrome (*TBX3*), Holt-Oram syndrome (*TBX5*), isolated adrenocorticotrophin deficiency (*TBX19*) and cleft palate with ankyloglossia (*TBX22*). Mutation of *TBX1* is likely to contribute to DiGeorge syndrome. Expression of *TBX2* and *TBX3* is amplified in breast, ovarian and pancreatic cancers, and both can contribute to oncogenic transformation (Fan et al., 2004; Rowley et al., 2004).

*Tbx20* is a T-box transcription factor that is expressed throughout the early cardiac crescent, and later in both myocardium and endocardium (Iio et al., 2001; Kraus et al., 2001). Expression of *Tbx20* or its homologues in cardiac

structures has been conserved from *Drosophila* to mammals (Plageman and Yutzey, 2005). In zebrafish and *Xenopus*, loss- or gain-of-function of *Tbx20* causes abnormal cardiogenesis (Brown et al., 2005; Stennard et al., 2003; Szeto et al., 2002). Injection of antisense morpholinos to *Tbx20* in zebrafish prevent heart looping, and result in defects in chamber morphology, aberrant expression of ventricular-specific myosin heavy chain in atrium and upregulation of *Tbx5* (Szeto et al., 2002). In *Xenopus*, the cardiac mass of *Tbx20* morphants is reduced, although no downstream targets of *Tbx20* have been identified, and *Tbx5* expression is normal (Brown et al., 2005). These results demonstrate a crucial role for *Tbx20* in cardiac morphogenesis, but do not provide mechanistic insight into how *Tbx20* is required for normal heart formation.

To investigate the role of *Tbx20* in mammalian heart, we have generated mice that are homozygous null for *Tbx20*. Null mutants arrest development in utero with arrested cardiac morphogenesis and hypoplastic hearts. Analysis of these mutants has revealed that *Tbx20* is a key component in a genetic network controlling regional differences in

proliferation and regulating morphogenesis within the developing heart. We have identified *Tbx2* as a crucial direct target for repression by *Tbx20* and have discovered that *Tbx2* itself directly represses *Nmyc1* (also known as N-myc) activity. *Nmyc1* is required for early myocardial proliferation, as demonstrated by severe cardiac hypoplasia in mice that are homozygous null for *Nmyc1* (Davis and Bradley, 1993).

Regional differences in proliferation rates within early looping heart have been determined and found to be consistent in chick, rat and mouse (Sedmera et al., 2003). Relatively low proliferation is observed in the sinoatrial region, the atrioventricular region, the outflow tract and within forming trabeculae of the ventricular myocardium. Differential proliferation has both morphogenetic and functional consequences. In forming ventricles, trabecular myocardium is relatively more differentiated, providing contractile force and allowing for proliferation of less-differentiated compact zone – the future thick-walled working myocardium (Rumyantsev, 1991). Other regions of low proliferative activity in early looping heart correlate with slow conducting myocardium, which acts as sphincters prior to valve development (de Jong et al., 1992).

Aberrant proliferation may underlie some adverse phenotypic consequences of T-box gene mutations in some human disorders and in cancer. *TBX1* is required for proliferation of cardiogenic progenitors that will contribute to the outflow tract, a region which does not form normally in individuals with di George syndrome (Xu et al., 2004). *Tbx5* has been shown to suppress proliferation of cardiomyocytes (Hatcher et al., 2001). A missense mutation of *TBX5*, which is causative for Holt Oram syndrome, lacks antiproliferative activity – a characteristic that can be blocked by treatment with wild-type *TBX5*. Mechanisms by which either *Tbx1* or *Tbx5* affect proliferation are unknown. *Tbx2* and *Tbx3* have each been identified in senescence bypass screens, and either *Tbx2* or *Tbx3* can immortalize mouse embryo fibroblasts and cooperate with the oncogenes *Myc* or *Ras* to result in transformation (Brummelkamp et al., 2002; Carlson et al., 2001; Carlson et al., 2002; Jacobs et al., 2000). *Tbx2* or *Tbx3* can promote immortalization by the direct repression of the tumor suppressor cyclin-dependent kinase 2a, *Cdkn2a* (Brummelkamp et al., 2002; Jacobs et al., 2000; Lingbeek et al., 2002). Cells that lack human *Cdkn2a* fail to senesce in culture and can be propagated indefinitely (Kamijo et al., 1997). *Cdkn2a* promotes stabilization of the tumor suppressor p53 (Sherr and Weber, 2000). *Tbx2* may also regulate proliferation/survival through direct repression of p21, a cyclin dependent kinase inhibitor implicated in senescence (Prince et al., 2004). Thus, *Tbx2* and *Tbx3* play crucial roles in cell cycle control via suppression of senescence genes.

In addition to its role in regulating regional proliferation, we have found that *Tbx20* regulates expression of a number of genes that specify regional identity within the heart, thereby coordinating these two important aspects of organ development.

## Materials and methods

### Targeted disruption of murine *Tbx20*

*Tbx20* genomic clones were isolated by screening a mouse 129/sv genomic library (Stratagene). The targeting vector was constructed in

a plasmid containing PGKNeo and HSV-TK cassettes flanked by two LoxP sites. To generate a floxed allele targeting construct, a *SmaI-SmaI* 1 kb genomic DNA fragment containing the second exon was cloned into a site flanked by two LoxP sites (Fig. 1). A 2.6 kb *SmaI-SmaI* fragment within intron 1 and a 4.4 kb *SmaI-NotI* fragment were cloned into the vector as the 5' arm or 3' arm, respectively. Targeting vector was linearized with *NotI* and electroporated into SM-1 ES cells derived from 129/sv mice. After G418 selection, homologous recombinants were identified by digesting genomic DNA with *NcoI* and hybridizing with a 176 bp *NcoI-SmaI* 5' probe. Recombinant ES cells were then transfected with a Cre plasmid in order to remove PGKNeo, HSV-TK cassettes (Fig. 1). ES cells with a floxed *Tbx20* allele were injected into C57BL/6 blastocysts. Chimeras were mated with C57BL/6 females and offspring were genotyped by PCR and Southern blot analysis of tail DNA. *Tbx20*-null mice were obtained by crossing mice with *Tbx20* floxed allele to protamine-Cre mice (O'Gorman et al., 1997). Genotypes were determined by PCR with primers: P-810, 5'-AGTGCTACCCTCTGCAGCTGCAAA-3'; P-1120, 5'-AGTAGGAAGGAGCTGGGAAGAGTA-3'; and P-2320, 5'-CAGAAAATGACACGCGGATGGTGG-3'. The wild-type allele band was 310 bp and the mutant allele band was 650 bp (Fig. 1).

### Whole-mount RNA in situ hybridization and histological analyses

Whole-mount RNA in situ hybridization was carried out according to Wilkinson's protocol (Wilkinson, 1992). For sectioning, mouse embryos were fixed in 4% paraformaldehyde, dehydrated in ethanol and embedded in paraffin wax. Transverse sections were cut and stained with Hematoxylin-Eosin according to a standard methods.

### Chromatin immunoprecipitation (ChIP) assay

For in vivo ChIP experiments, extracts were prepared from 20 E8.75-9.5 wild-type mouse hearts. Embryos were dissected in ice-cold PBS. Following gentle pipetting, tissue was crosslinked with 2% formaldehyde for 2 hours at room temperature. Chromatin extraction and immunoprecipitations were performed using a ChIP assay kit (Upstate, 17-295) according to manufacturer's protocol. Protein-DNA crosslinking was reversed by overnight incubation at 65°C. A PCR purification kit (QIAGEN, 28106) was used to recover DNA in 50 µl. The following PCR primers against the 5' *Tbx2* promoter region were used: P-813 (5'-CTCCCTCTGAAGTGCATGGAC-3') and P-573 (5'-AGCGCAGAGGACCGATCTGAC-3'). As control, primers against an unrelated region of *Tbx2* promoter region were used: primer E (5'-CTCTGGTTCCTAGGCAGGACTCGG-3') and primer F (5'-TCC-TCTGCAGTCTGCCTGTCTGTG-3').

The following PCR primers against the *Nmyc1* intron 1 promoter region were used: P-4030 (5'-CCAGGCAGAGAAATAGCTTTA-GCG-3') and P-4330 (5'-CCTTTCCATTCCCCTTCCTTCAGA-3'); P4630 (5'-CCAGGCAGTGCCTTGTGTGAAT-3') and P-4930 (5'-GCCAACCTCCAACTCTACAACC-3'). As control, primers against an unrelated region of *Nmyc1* promoter region were used: primer G (5'-GAGGCTATGTGGCTTCTAGGAGAG-3') and primer H (5'-GGATGTTAGATGTCCAGTCTCACC-3').

The following PCR primers against the *Isl1* 5' promoter region were used: P-842 (5'-CGGGAGGAAAGGAACCAACCT-3') and P-581 (5'-CCGGAGTAGGACGGTTAGACC-3'). As controls, primers against an unrelated region of *Isl1* promoter region were used: primer I (5'-CTCTGGTTCCTAGGCAGGACTCGG-3') and primer J (5'-GCGGTCTGCTGCTCGGCTCAGC-3').

*Tbx20* polyclonal antibody was obtained from Orbigen (PAB-11248) and *Tbx2* polyclonal antibody was obtained from Upstate (07-318).

### Promoter cloning and luciferase transfection assay

A 1 kb genomic DNA fragment upstream of *Tbx2* ATG was amplified with high fidelity DNA polymerase (Novagen, 71086-3) and cloned into pGL3-basic vector (Promega, E1751). Primers were: 5' primer

5'-CATCAGGGTCTGCCATGGCTC-3', 3' primer 5'-GGCTCTC-TCATCGGGACATCC-3'. A full-length 1.3 kb Nmyc1 intron 1 promoter fragment was cloned into pGL3-basic vector following PCR. Primers were: 5' primer 5'-AGCGGTACTTGCGAAGCTTC-GA-3', 3' primer 5'-CGCCTCTCTTTAATATCTCCGCT-3'.

A 1.5 kb genomic DNA fragment upstream of Isl1 ATG was amplified and cloned into pGL3-basic vector. Primers were: 5' primer 5'-GAATTCGTGTGTGCCCTAATAAC-3', 3' primer 5'-AGAGGG-AGTAATGTCCACAGTGAA-3'.

Transfections were carried out in HEK 293 cells according to standard techniques by FUGENE6 (Roche). Cells were lysed 48 hours after transfection, and luciferase and  $\beta$ -galactosidase activities were measured on a Luminoskan Ascent luminometer (Thermo Labsystems). For luciferase reporters, CMV- $\beta$ -galactosidase was used to control for transfection efficiency. Normalized luciferase activities were compared with a pGL3 control to calculate relative repression. Results are from one representative experiment carried out in triplicates and expressed as mean $\pm$ s.d. At least three independent transfection experiments were performed.

#### Site-directed mutagenesis

The QuickChange site-directed mutagenesis kit (Stratagene, 200518) was used to make point mutations in T-box binding sites in the promoter region according to the manufacture's protocol.

#### Whole-mount cell death (TUNEL) assay

Whole-mount TUNEL staining was performed with In Situ Cell Death Detection Kit (Roche, 1 684 817) followed a modified protocol (Chi et al., 2003; Hensey and Gautier, 1998; Yamamoto and Henderson, 1999).

#### Whole-mount proliferation assay

The whole-mount mouse embryo cell proliferation assay was performed as described (Nagy et al., 2003). Anti-phospho-Histone H3 (Ser10) (1:100 dilution) was obtained from Upstate (06-570).

## Results

### **Tbx20-null mice are embryonic lethal and exhibit unlooped severely hypoplastic hearts**

To investigate the role of Tbx20 in mammalian heart development, we generated *Tbx20* knockout mice. Homozygous null mice arrested development at E9.0 and died at E10.5. Hearts of Tbx20 mutants exhibited an unusual cardiac phenotype, somewhat resembling an 'hourglass', and were unlooped and severely hypoplastic (Fig. 1E-L).

### **Myocardial differentiation and anteroposterior patterning occur in Tbx20 mutant hearts**

Tbx20 is expressed in throughout early differentiating myocardium, suggesting that it might play a role in differentiation. To investigate this, we performed whole-mount in situ hybridization to examine RNAs encoding myofibrillar proteins myosin light chain 2a (MLC2a) and  $\beta$  myosin heavy chain ( $\beta$ -MHC), both expressed throughout myocardium, myosin light chain 2v (MLC2v), restricted to ventricle and atrioventricular canal, and  $\alpha$  myosin heavy chain ( $\alpha$ -MHC), restricted to the atrioventricular canal and forming atrium at early stages. Expression of MLC2a, MLC2v and myosin heavy chain was intact in Tbx20 mutants, demonstrating that myocardial differentiation had occurred. Expression of  $\alpha$ -MHC, however, was greatly reduced relative to wild-type controls, suggesting that some aspects of specification or differentiation may be perturbed in *Tbx20*-null mice (Fig. 2A-H).

To determine whether individual cardiac segments were present, we performed whole-mount RNA in situ analysis for markers of distinct cardiac segments and anterior posterior polarity: Tbx5 (left ventricle and atria), Wnt11 (outflow tract, right ventricle and atrioventricular canal) and GATA4 (expressed throughout the heart in an anterior posterior gradient) (Fig. 2I-N). Results demonstrated that overall anteroposterior patterning had occurred in *Tbx20* mutants, although Wnt11 expression in a putative atrioventricular canal region was absent in Tbx20 mutants. This could indicate regional downregulation of Wnt11 or an absence of atrioventricular canal identity.

### **Tbx2 is upregulated in Tbx20 mutants and is directly repressed by Tbx20**

Hearts in *Tbx20*-null mice closely resembled those described for transgenic mice overexpressing Tbx2 in myocardium (Christoffels et al., 2004). Indeed, we found that Tbx2 is highly upregulated in Tbx20 null mice, beginning at early cardiac crescent stages (Fig. 3A-F). These data suggested that upregulation of Tbx2 could account for the heart phenotype in Tbx20 mutants. Transgenic mice overexpressing Tbx2 in myocardium exhibit decreased expression of several genes, including atrial natriuretic peptide (*Nppa*), the muscle-specific gene chisel (*Smpx* – Mouse Genome Informatics) and the transcriptional co-activator *Cited1*. Expression of each of these genes is greatly reduced or absent in *Tbx20* mutants (Fig. 3G-L).

To investigate a potential feedback loop between Tbx20 and Tbx2, we examined expression of *Tbx20* mRNA in *Tbx20* mutants. Although no Tbx20 protein is present in homozygous null mice, *Tbx20* mRNA can still be detected. We observed no differences between Tbx20 expression in wild-type and null mice, demonstrating that the observed regulatory interaction between Tbx20 and Tbx2 is unidirectional, and suggesting lack of autoregulation of Tbx20 at the transcriptional level (Fig. 3M-N).

Tbx2 is most closely related to Tbx3, and the two genes are expressed in an overlapping pattern in developing heart (Hoogaars et al., 2004), suggesting that they may, in some instances, be regulated coordinately. However, Tbx3 expression was unaltered in *Tbx20* mutants (Fig. 3O-P).

We investigated whether upregulation of Tbx2 in Tbx20 mutants reflected direct repression by Tbx20 in wild-type hearts. Analysis revealed two conserved T-box recognition sites between 677-688 bp upstream of a putative transcription start site of the Tbx2 gene. ChIP analysis was performed on extracts from E8.75-E9.5 hearts and demonstrated that Tbx20 protein was recruited to this region, but not to an unrelated 5' genomic region of Tbx2 (Fig. 3Q). Co-transfection assays with a luciferase reporter driven by a 1 kb Tbx2 promoter and a Tbx20 expression vector demonstrated a fourfold repression of the Tbx2 promoter by Tbx20. This repression was relieved by mutation of the conserved T-box sites (Fig. 3R). These data demonstrated that Tbx20 directly represses Tbx2 within developing heart.

### **Proliferation, but not apoptosis, is affected in Tbx20 mutants**

Reduced heart size in *Tbx20*-null mutants suggested an increase in cell death or decrease in cell proliferation, or both.

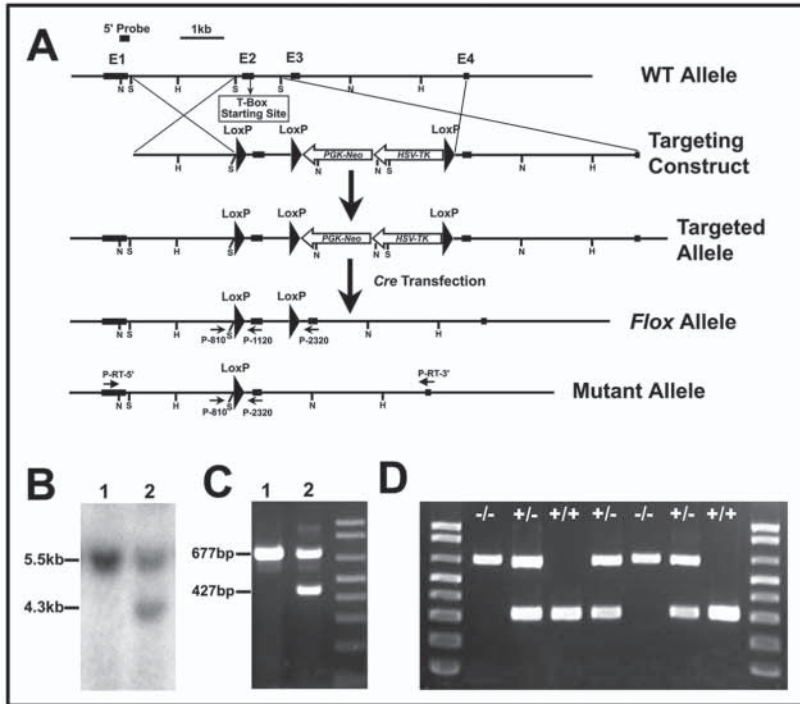

**Fig. 1.** (A-D) Generation of *Tbx20* targeted allele.

(A) Two LoxP sites were induced into *Tbx20* exon 2 where the T-box domain starts. (B) Southern blot of ES cell DNA digested with *NcoI* and hybridized with a genomic fragment external to the targeting construct with wild-type band 5.5 kb and recombinant band 4.3 kb. Recombinant ES cells were then transfected with a Cre plasmid in order to remove PGKNeo, HSV-TK cassettes. *Tbx20*-null mice were obtained by crossing mice with *Tbx20* floxed allele to protamine-Cre mice. (C) RT-PCR using whole heart RNA obtained from adult wild-type (lane 1) and heterozygous mice (lane 2) with primers located in exon 1 (P-RT-5') and exon 3 (P-RT-3') showed the wild-type band 677 bp and mutant band 427 bp. Excision of exon 2 of *Tbx20* created a new immediate stop codon within exon 3. (D) Genotypes determined by PCR of one littermate embryos from heterozygous cross. The wild-type allele band was 310 bp and the mutant allele band was 650 bp. (E-L) Whole-mount (E,F,I,J) and histological (G,H,K,L) views of *Tbx20*-null mice and littermate controls at E8.5 and E9.5. The left, middle and right columns give right, frontal and left views, respectively. Hearts of *Tbx20*-null mice are severely hypoplastic relative to control littermates at both stages. Arrows indicate the heart region.

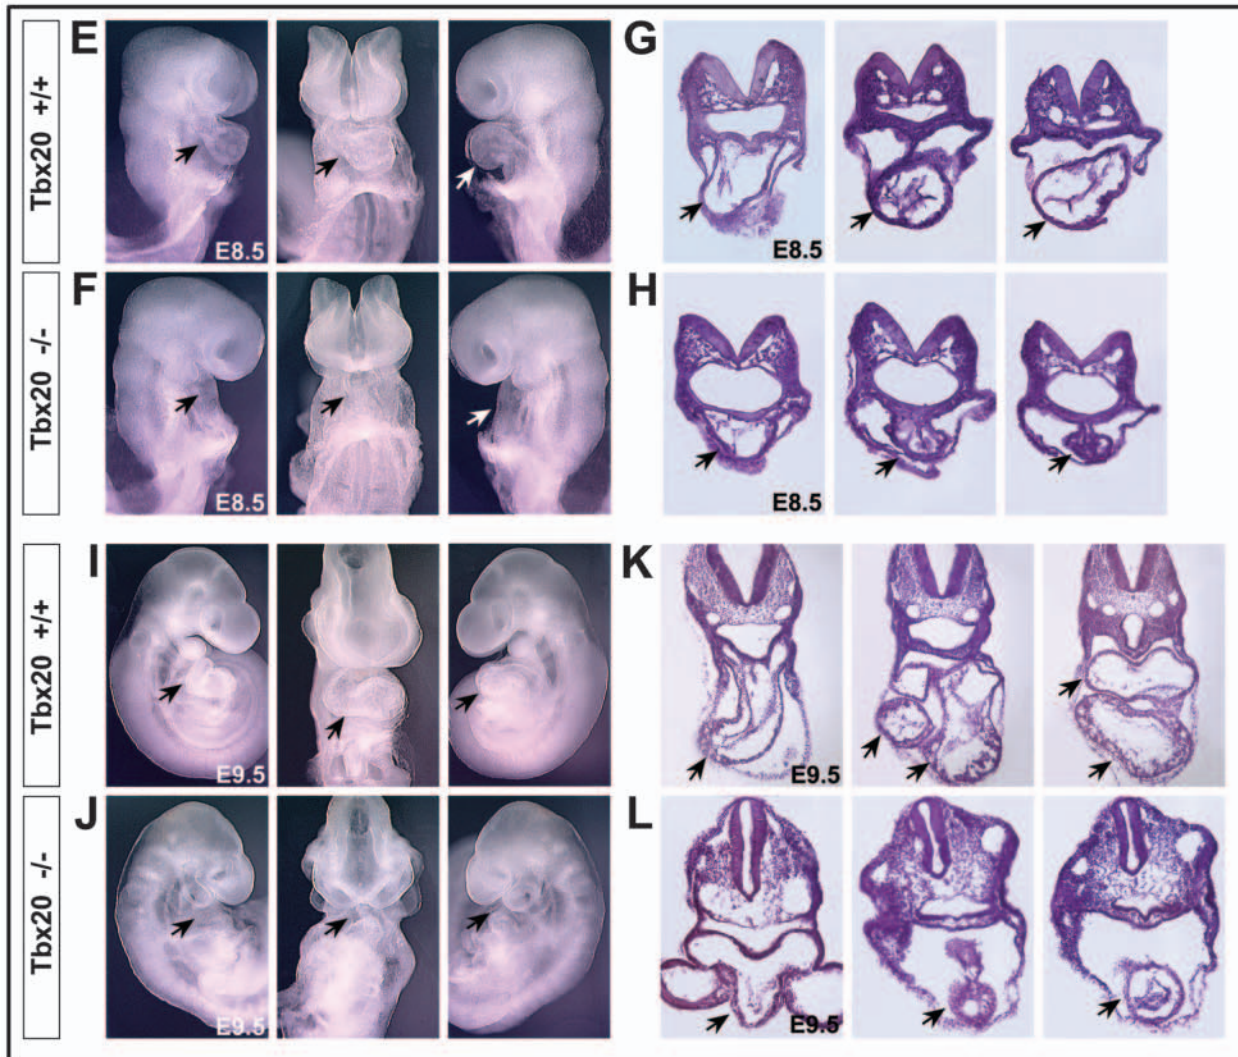

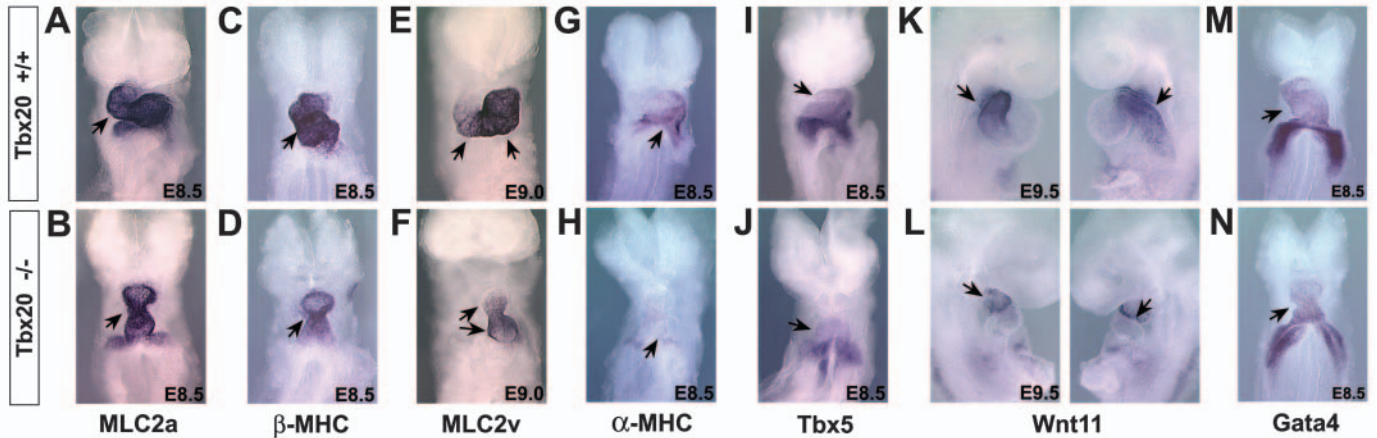

**Fig. 2.** Whole-mount in situ analysis of *Tbx20*-null mutants and control littermates. (A-H) Differentiation markers MLC2a,  $\beta$ -MHC and MLC2v are normally expressed in *Tbx20* mutants;  $\alpha$ -MHC, however, is downregulated. (I,J) *Tbx5* is expressed in left ventricular, atrioventricular and atrial progenitors in an anteroposterior gradient. This expression profile is maintained in *Tbx20* mutants. (K,L) *Wnt11* is expressed in outflow tract and atrioventricular canal. In *Tbx20* mutants, outflow tract expression is present, but atrioventricular canal expression is lacking. (M,N) *GATA4* is expressed throughout the heart in an anteroposterior gradient that is maintained in *Tbx20* mutants. Arrows indicate the corresponding heart regions in wild type and mutant embryos.

TUNEL assays demonstrated no differences in apoptosis between wild-type or mutant embryos at E7.5 or E8.5 (Fig. 4A-D). Whole-mount immunostaining with antibody to phosphorylated histone H3, however, demonstrated decreased proliferation in *Tbx20* mutant hearts relative to hearts of wild-type littermates at E8.0 and E8.5 (Fig. 4E-L). Proliferation rates were assessed by examination of sections. At E8.0, the number of phosphorylated histone H3 positive nuclei within myocardium of *Tbx20* mutants was reduced from 3.5% in wild type to 1.4% in mutants. At E8.5, the number of positive nuclei was reduced from 3.7% in wild type to 1.0% in mutants, indicating significant reduction in proliferation rate in myocardium of *Tbx20* mutants. To ensure that the proliferative decrease in heart was specific, we assessed proliferation rates in neural folds, which do not express *Tbx20* at this stage, and found no significant difference between wild-type and mutant embryos (5.9% and 5.7%, respectively).

### **Nmyc1 and cyclin A2 are downregulated in *Tbx20* mutant hearts**

Decreased proliferation in *Tbx20* mutant hearts suggested downregulation of genes important for cell cycle regulation in cardiomyocytes. *Nmyc1* is required for early myocardial proliferation (Davis and Bradley, 1993). Cyclin A2 is required for proliferation in early embryos, and is implicated in myocyte proliferation (Chaudhry et al., 2004; Murphy et al., 1997). We found expression of both genes was severely downregulated in *Tbx20* mutant hearts, consistent with observed defects in proliferation (Fig. 5A-H).

### **Regional variation in expression of *Nmyc1*, cyclin A2 and phosphorylated histone H3 correlates with *Tbx2* expression**

During our analysis, we observed local differences in expression of cyclin A2 and *Nmyc1* within wild-type heart (Fig. 5A,E,C,G). Regions that had relatively low levels of expression were similar for cyclin A2 and *Nmyc1*, and

included the outflow tract and atrioventricular canal. These regions are those in which *Tbx2* is expressed, and suggested that one of these genes might be a direct target of *Tbx2*. Bioinformatic analysis of 2 kb upstream of the translation start codon or 2 kb downstream, including intron 1, of cyclin A2 did not reveal any conserved T-box sites between human and mouse. However, similar analysis of sequences within the *Nmyc1* gene revealed two clusters of conserved T-box sites within intron 1 (Fig. 5M). These sites are within regions previously defined to be required for expression of *Nmyc1* both in vitro and in vivo (Strieder and Lutz, 2002).

### ***Tbx2* directly represses *Nmyc1***

ChIP analysis with E8.75-E9.5 embryonic heart extracts revealed that *Tbx2* was recruited to both clusters of T-box sites within intron1 of *Nmyc1* (Fig. 5M-1,M-2). Control sites further upstream were negative (Fig. 5M-3). Co-transfection of an *Nmyc1* intron 1-luciferase reporter with a *Tbx2* expression vector in HEK293 cells demonstrated significant downregulation of the *Nmyc1* promoter fragment by *Tbx2* (Fig. 5O). By contrast, similar studies with *Tbx20* demonstrated in vivo binding, and in vitro activation of the *Nmyc1* promoter fragment by *Tbx20*, demonstrating specificity of repression by *Tbx2* (Fig. 5N). Repression by *Tbx2* of the *Nmyc1* promoter was dose dependent. These data demonstrate that *Tbx2* directly binds to T-box consensus sites within intron 1 of the *Nmyc1* gene to repress transcriptional activity of *Nmyc1*.

### ***Tbx20* is required for expression of *Bmp2* and *Bmp5***

Our data demonstrated downregulation of *Nmyc1* in *Tbx20* mutants. Cardiac hypoplasia in *Tbx20* mutants, or myocardial-*Tbx2* transgenics (Christoffels et al., 2004), however, appears to be more severe than observed in *Nmyc1*-null mice (Charron et al., 1992; Moens et al., 1993; Sawai et al., 1993), suggesting that perturbation of genes in addition to *Nmyc1* might account for the severity of the growth phenotype in *Tbx20*-null mice. Accordingly, we examined expression of bone morphogenetic

proteins, which have been demonstrated to play a role in early myocardial growth, often in a redundant fashion (Kim et al., 2001; Liu et al., 2004; Solloway and Robertson, 1999; Zhang and Bradley, 1996). Results demonstrated that expression of *Bmp4* and *Bmp7* was not downregulated in *Tbx20*-null mice, whereas expression of *Bmp2* and *Bmp5* was severely downregulated (Fig. 6).

### Tbx20 is required for expression of genes that also require *Nkx2-5* expression

Several genes downregulated in transgenic mice overexpressing *Tbx2* in myocardium (Christoffels et al., 2004), and in *Tbx20* knockouts, are also downregulated in *Nkx2-5* knockout mice (Harvey, 2002), including *Nppa*, *chisel* and *Cited1*. Accordingly, we investigated whether *Nkx2-5* was downregulated in *Tbx20* mutants. We found no evidence for downregulation of *Nkx2-5* in *Tbx20* mutants from E8.5-E9.25, suggesting that downregulation of *Nppa*, *chisel* and *Cited1* in *Tbx20* mutants was not a consequence of downregulation of *Nkx2-5*. Two other genes downregulated in *Nkx2-5* mutants, *Hand1* and *Irx4*, were also downregulated in *Tbx20* mutants (Fig. 7). Expression of these genes was not examined in transgenics overexpressing *Tbx2*. Expression of *Hand2* was not affected in *Tbx20* mutants.

### Tbx20 directly represses expression of *Isl1* in myocardium

The LIM-homeodomain transcription factor *Isl1* is

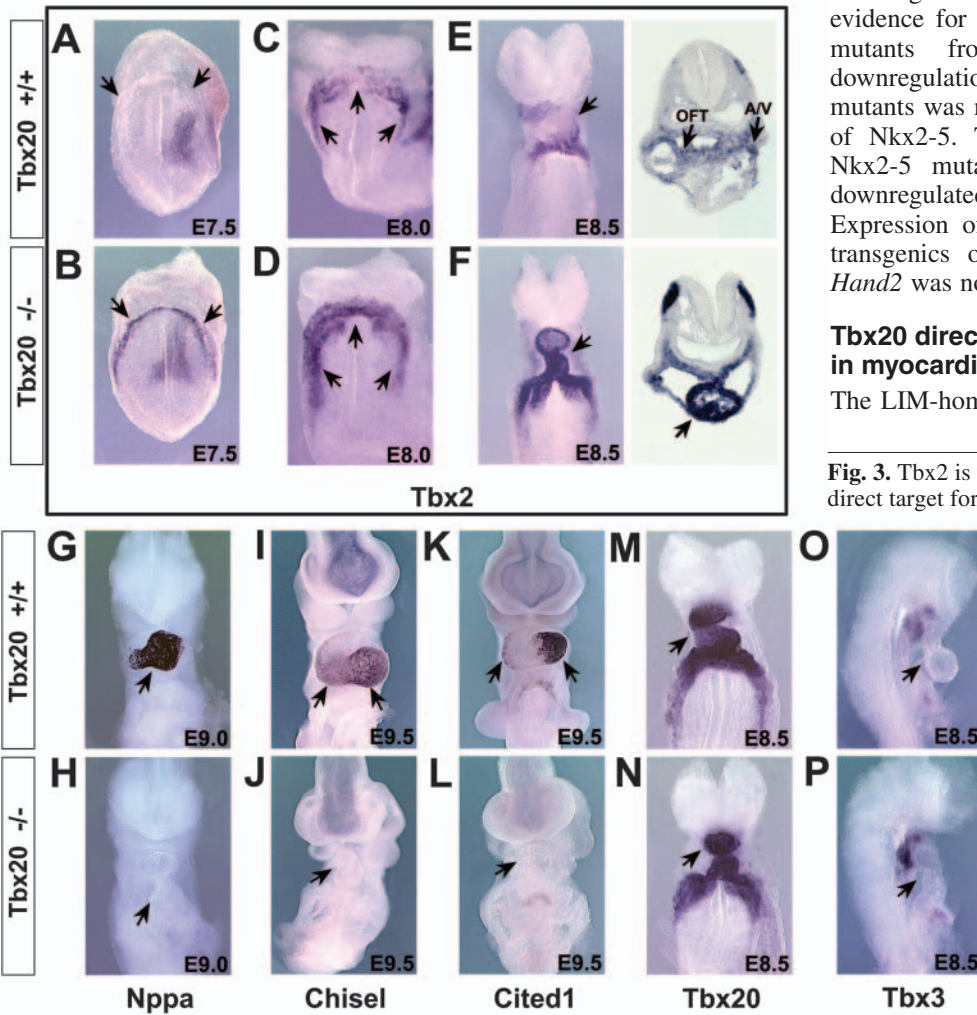

**Fig. 3.** *Tbx2* is upregulated in *Tbx20* mutants and is a direct target for repression by *Tbx20*. (A-F) Whole-mount RNA in situ and section analysis for *Tbx2* expression in *Tbx20*-null embryos and wild-type littermates. Arrows indicate the corresponding heart regions in wild type and mutant embryos. OFT, outflow tract; A/V, atrioventricular canal. (G-L) Whole-mount RNA in situ demonstrates downregulation of *Nppa*, *chisel* and *cited 1* in *Tbx20* mutants. (M-P) Expression of *Tbx20* and *Tbx3* is unaffected. Arrows indicate the corresponding heart regions in wild type and mutant embryos. (Q) ChIP analysis with embryonic heart extracts revealed binding of *Tbx20* to region containing conserved T-box sites within *Tbx2* promoter (lane 1, primer P-813, P-573). ChIP analysis with primers against an unrelated promoter region revealed no *Tbx20* recruitment (lane 2) (see Materials and methods for primers). No recruitment was found with beads, IgG or  $H_2O$ . (R) Co-transfection of *Tbx20* expression vector (500 ng) with *Tbx2* promoter-luciferase constructs (100 ng) into HEK293 cells demonstrates repression by *Tbx20*, which was abrogated by mutation (Mu) of conserved T-box elements within the *Tbx2* promoter. \* $P < 0.05$ , paired *t*-test.

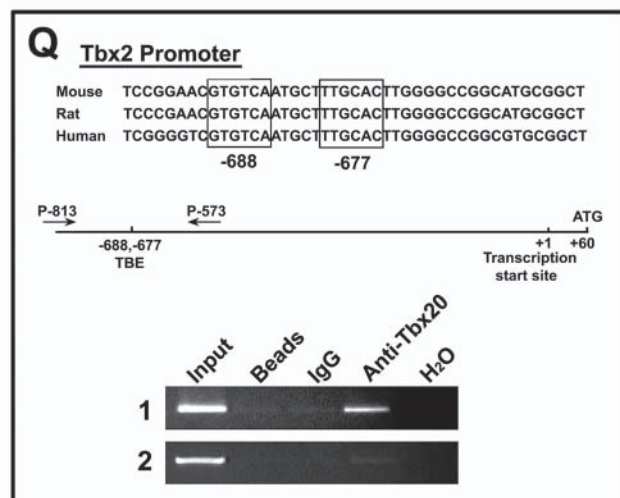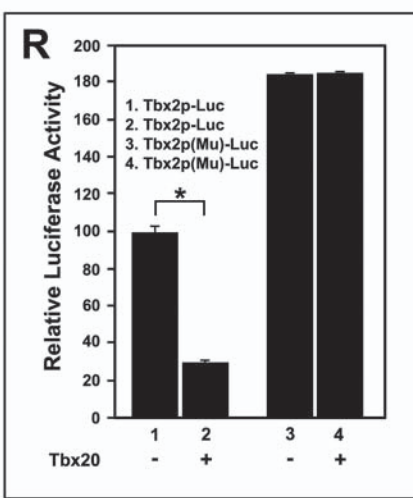

required for proliferation, survival and migration of a subset of undifferentiated cardiac progenitors, and is downregulated as they enter the heart and differentiate (Cai et al., 2003). We observed that *Isl1* is upregulated throughout the heart of *Tbx20* mutants (Fig. 8A-D) and subsequently demonstrated by ChIP analysis and transfection studies that *Tbx20* directly binds and represses conserved T-box sites within *Isl1* promoter sequences (1.5 kb upstream of ATG) (Fig. 8E-F). Functional consequences of this upregulation are not yet clear, but it is unlikely that *Isl1* upregulation contributes substantially to the *Tbx20*-null phenotype, as hearts of transgenic mice expressing *Isl1* at comparable levels throughout myocardium appear relatively normal at E10.5 (Fig. 8G-J).

## Discussion

In these studies, we have identified two direct targets for repression by *Tbx20*, including *Tbx2* and *Isl1*. Interactions between *Tbx20* and *Tbx2* are required for regional proliferation, morphogenesis and aspects of specification in early heart, while *Isl1* is required for proliferation, survival and migration of a subset of undifferentiated cardiac progenitors (Cai et al., 2003). As these progenitors enter the heart and differentiate, *Isl1* is downregulated. Factors regulating its

expression in this context have not been defined previously. Although functional consequences of *Isl1* expression throughout myocardium remain to be explored, evidence from transgenic mice expressing *Isl1* throughout myocardium (Fig. 8G-J) have demonstrated that upregulation of *Isl1* does not account for the cardiac phenotype in *Tbx20* mutants.

Our studies suggest that T-box genes regulate the *Nmyc1* promoter with consequences for organ morphogenesis and implications for human congenital disease and cancer. *Tbx2*, which is normally expressed in outflow tract and atrioventricular canal, is upregulated throughout the heart in *Tbx20* mutants. The cardiac phenotype of *Tbx20* mutants mimics that of mice overexpressing *Tbx2* in myocardium (Christoffels et al., 2004), suggesting that upregulation of *Tbx2* could account for the observed cardiac phenotype of *Tbx20*-null mice. We have provided evidence that *Tbx2* is a direct target of *Tbx20* in developing heart. In vivo ChIP analysis performed on embryonic heart extracts has demonstrated direct binding of *Tbx20* to a region of the *Tbx2* promoter containing conserved T-box consensus sites. Transfection studies demonstrated that activity of this promoter was repressed by co-transfection with a *Tbx2* expression vector, in a manner dependent on presence of conserved T-box sites within the promoter. It should be noted that *Tbx2* and *Tbx20* are co-expressed in outflow tract and atrioventricular canal, suggesting that repression of *Tbx2* by *Tbx20* is context dependent.

To define targets of *Tbx2* that could explain defects in proliferation, we examined two cell cycle genes previously implicated in cardiomyocyte proliferation, cyclin A2 and *Nmyc1* (Chaudhry et al., 2004; Davis and Bradley, 1993; Murphy et al., 1997), and found that both were downregulated in *Tbx20* mutant hearts. During our analysis, we observed similar regional differences in expression of both these genes in wild-type heart. Regions of relatively low expression coincided with regions expressing *Tbx2*, consistent with the idea that *Tbx2* might be suppressing proliferation by acting directly on either cyclin A2 or *Nmyc1*. No consensus T-box sites were identified in putative promoter regions of cyclin A2. However, a cluster of conserved T-box sites was identified within intron 1 of *Nmyc1*. This intron is within a human

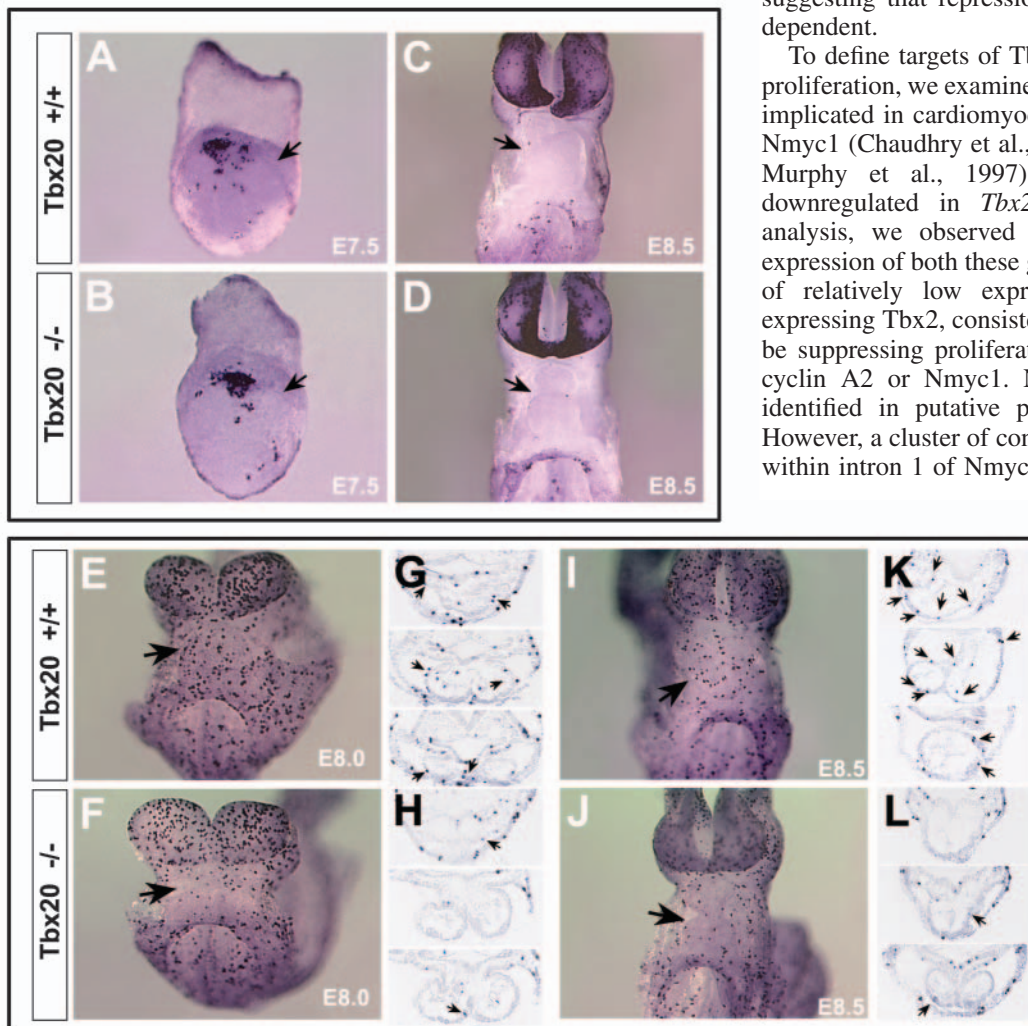

**Fig. 4.** Apoptosis and proliferation assays in *Tbx20*-null mutants and control littermates. (A-D) TUNEL analysis revealed no increase in apoptosis in *Tbx20*-null embryos relative to control littermates. Arrows indicate cardiac crescent (A,B) and heart tube (C,D). (E-L) Antibody staining (whole mount and sections) for phosphorylated histone H3 reveals decreased proliferation in *Tbx20*-null mutants relative to control littermates. Arrows indicate positive phosphorylated histone H3 staining in cardiomyocytes.

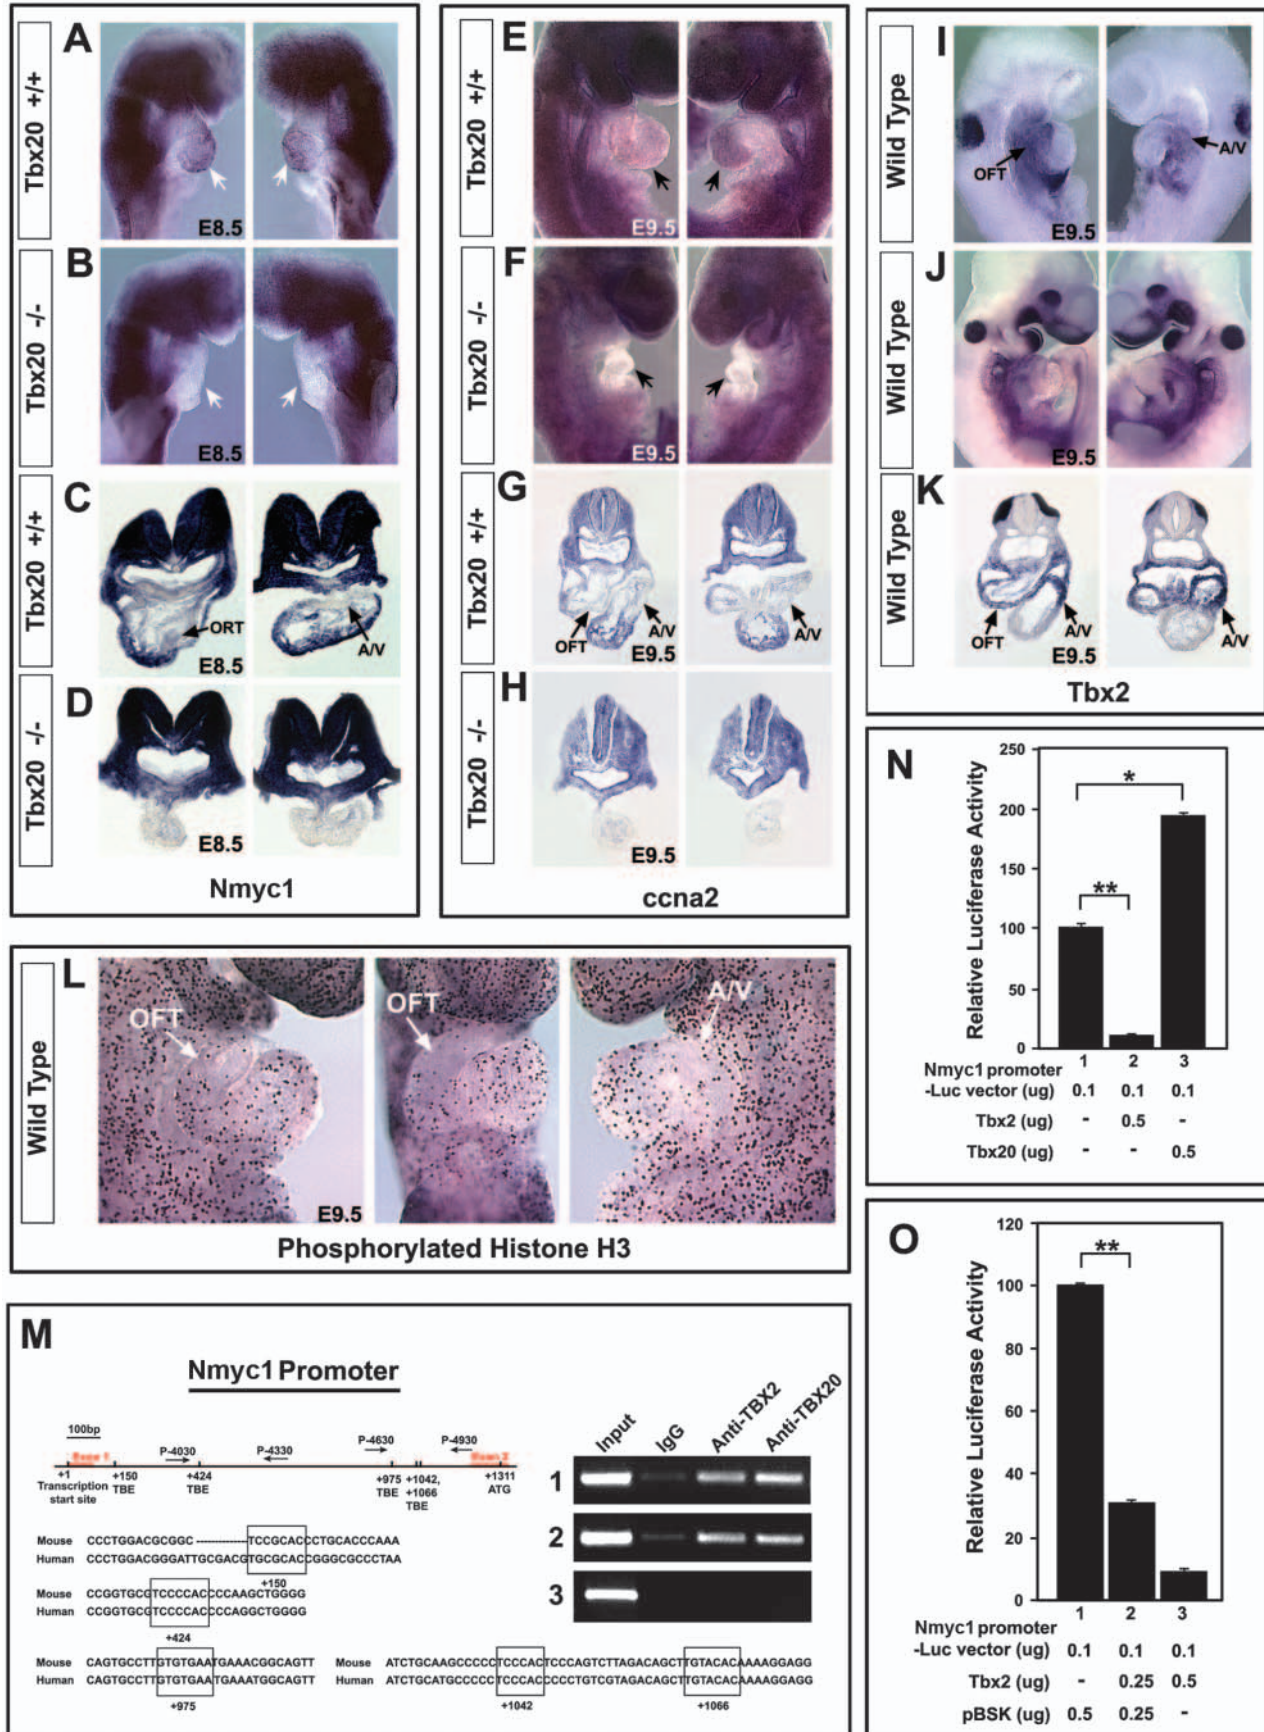

Fig. 5. See next page for legend.



**Fig. 5.** Tbx2 directly binds *Nmyc1* and represses its expression in regions of relatively low proliferation within the heart. (A-H) Regions of relatively low proliferation; outflow tract (OFT) and atrioventricular canal (A/V) are indicated by arrows. Corresponding sections (C,D; G,H; K) are shown progressively from anterior to posterior, respectively. Expression of *Nmyc1* (A-D) and cyclin A2 (E-H) is downregulated in *Tbx20*-null mutants. Section analysis of wild-type littermates reveals regional differences in expression of *Nmyc1* (C) and cyclin A2 (*Ccna2*) (G), with relatively low levels in OFT and A/V. (I-K) Wild-type *Tbx2* expression is complementary to that of *Nmyc1* and cyclinA2. (L) Expression of phosphorylated histone H3 in wild-type embryos revealed regions of low proliferation within developing heart. The left, middle and right panels show right, frontal and left side views, respectively. (M) ChIP analysis with embryonic heart extracts demonstrated recruitment of Tbx2 and Tbx20 to regions containing T-box consensus sites within intron 1 of the *Nmyc1* gene (lane 1, primer P-4030, P-4330; lane 2, primer P-4630, P-4930). ChIP analysis with primers against an unrelated promoter region revealed no Tbx2 recruitment (lane 3) (see Materials and methods for primers). No recruitment was found with IgG. (N) Co-transfections of Tbx2 or Tbx20 expression vectors with *Nmyc1* intron 1-luciferase reporter into HEK293 cells demonstrated repression or activation, respectively. \*\* $P < 0.005$ , paired *t*-test; \* $P < 0.05$ , paired *t*-test. (O) Co-transfections of Tbx2 expression vector with *Nmyc1* intron 1-luciferase reporter into HEK293 cells demonstrated dose-dependent repression by Tbx2. \*\* $P < 0.005$ , paired *t*-test.

*NMYC1* transgene that recapitulates expression pattern of the endogenous *Nmyc1* gene in newborn mice (Zimmerman et al., 1990). Sequences within exon1 and/or intron 1 of *Nmyc1* direct tissue-specific expression in cancer cell lines, and contain both positive and negative regulatory elements, some acting at a post-transcriptional level (Strieder and Lutz, 2002).

*Nmyc1* is expressed in early myocardial cells, and is required for normal proliferative growth of the heart (Charron et al., 1992; Moens et al., 1993; Sawai et al., 1993). Mice that are homozygous null for *Nmyc1* arrest their development at ~E9.5, and die between E10.5 and E11.5, with severely hypoplastic hearts, undivided thin-walled ventricles and few trabeculae. Factors that regulate *Nmyc1* expression during embryogenesis have not been defined previously. We have found that Tbx2 directly binds to *Nmyc1* enhancer elements with conserved T-box sites in early developing heart, and can repress *Nmyc1* promoter activity in transfection studies. Tbx20 is also able to bind to this

**Fig. 6.** Tbx20 regulates expression of a subset of BMP genes. Expression of *Bmp4* (C,D) and *Bmp7* (G,H) are not downregulated in *Tbx20* mutants, whereas expression of *Bmp2* (A,B) and *Bmp5* (E,F) is severely downregulated specifically in the heart, as indicated by arrows. The left and right images in A and B show frontal and left views, respectively.

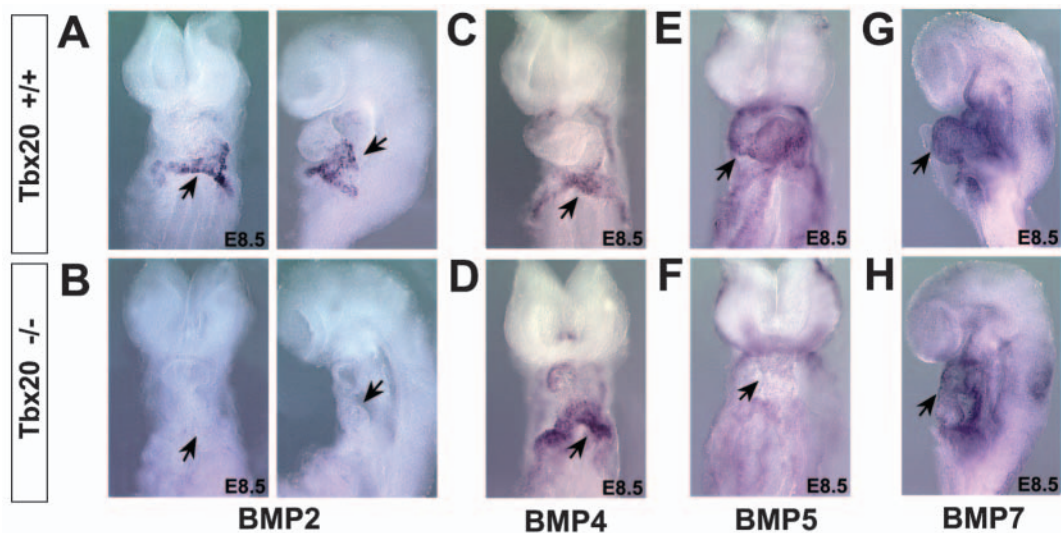

*Nmyc1* enhancer, but does not repress its activity in our in vitro assay system. This observation suggests the possibility that Tbx20 may block Tbx2 repression of *Nmyc1* by competitive binding. Although both *Tbx20* and *Nmyc1* mutants have hypoplastic hearts, the cardiac hypoplasia in *Tbx20* mutants is more severe than that of *Nmyc1* mutant mice. Close resemblance of the *Tbx20* cardiac phenotype to that of  $\beta$ -MHC-Tbx2 transgenic mice suggests that aberrant regulation of additional downstream targets of Tbx2 may work in concert with *Nmyc1* repression to contribute to the severely hypoplastic phenotype. In this regard, we observed downregulation of two BMP growth factor genes, *Bmp2* and *Bmp5*, in *Tbx20* null mice. Previous studies have demonstrated that ablation of these genes can affect early myocardial development (Solloway and Robertson, 1999; Zhang and Bradley, 1996). Intriguingly, studies in chick embryos have demonstrated that *Bmp2* can induce expression of Tbx2 in heart (Yamada et al., 2000). Here, we observe downregulation of *Bmp2* in a situation where Tbx2 is overexpressed in the heart, suggesting that there may be a negative feedback loop between *Bmp2* and Tbx2. Interactions between Tbx2, Tbx20 and BMPs will be a subject for future investigation.

Our results suggest a model in which regional expression of Tbx2 in outflow tract and atrioventricular canal suppresses *Nmyc1* expression to result in relatively low rates of proliferation. By contrast, in chamber myocardium, Tbx20 represses *Tbx2*, preventing its repression of *Nmyc1* and allowing for higher rates of proliferation. Regulation of *Nmyc1* by Tbx2 was dose dependent, suggesting that differential proliferation rates can be regulated by the amount of Tbx2 present.

Our data have demonstrated a role for Tbx20 in control of regional proliferation at the early heart tube stage. Mutations in other genetic pathways have demonstrated a role in later growth of ventricular myocardium, resulting in mid-gestational embryonic lethality. These include neuregulin/erbB signaling from endocardium to myocardium (Carraway, 1996; Negro et al., 2004), *Fgf/Fgfr* signaling from endocardium and epicardium to myocardium (Lavine et al., 2005), and *Bmp10* signaling within myocardium, negatively regulated by *Nkx2-5* (Chen et al., 2004; Pashmforoush et al., 2004). As Tbx20 is

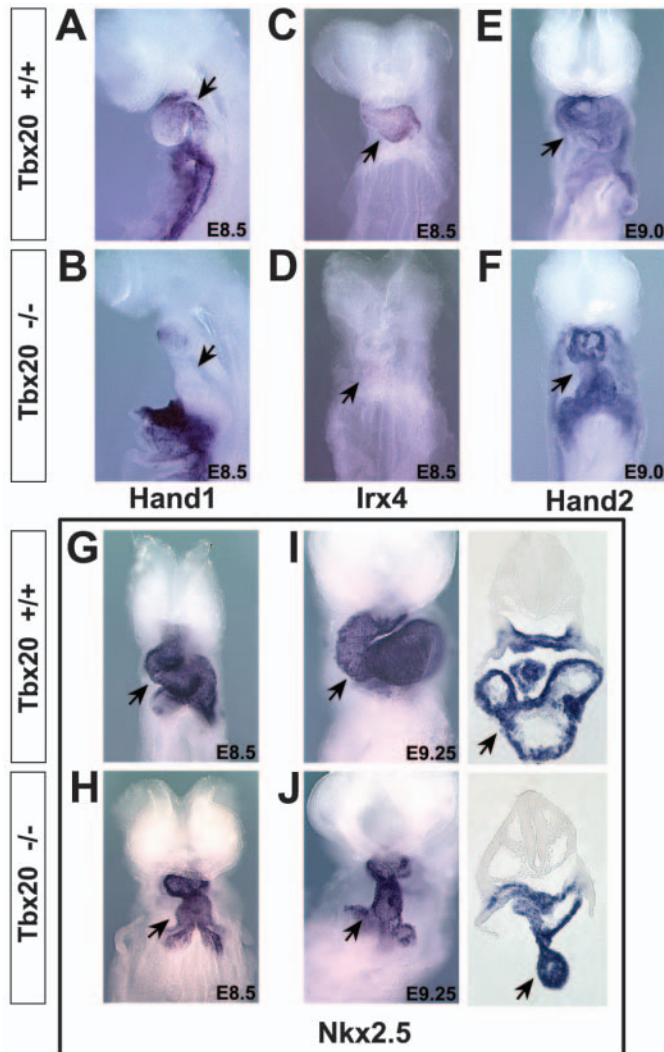

**Fig. 7.** *Tbx20* and *Nkx2-5* independently regulate common downstream targets. (A–D) Expression of *Hand1* and *Irx4* is downregulated in *Tbx20* mutants. (E, F) *Hand2* and (G–J) *Nkx2-5* expression are unaffected in *Tbx20* mutants. Images in A, B show left side views and images in C–J show frontal views. Arrows indicate the corresponding heart regions in wild type and mutant embryos.

expressed in ventricular myocardium during midgestation, it may also be working in concert with these pathways to control later cardiac growth.

Evidence suggests that *Tbx2* may regulate *Nmyc1* in other contexts. Downregulation of *Nmyc1* is an early response in retinoic acid-induced differentiation of neuroblastoma cells; *Tbx2* is expressed in neuroblastoma cells, as demonstrated by microarray analysis (Schulte et al., 2005; Thiele et al., 1985). It will be of great interest to investigate interactions between *Nmyc1* and *Tbx2* in neuroblastoma. In melanocytes and melanoma cells, *Tbx2* is a direct target of *Mitf*, a basic helix-loop-helix leucine zipper transcription factor that is central to pathways controlling proliferation and differentiation of melanoblasts and melanocytes, and is likely to be a negative regulator of cell cycle progression (Vance and Goding, 2004). B16 melanoma cells differentiate in response to retinoic acid and *Tbx2* is an immediate-early target (Niles, 2003). These

data suggest that *Tbx2* plays a key role in cell cycle regulation in both melanocytes and melanoma cells, and that *Nmyc1* may be a target of *Tbx2* in this context.

A role for *Tbx2* in cancer is postulated from the observation that overexpression of *Tbx2* allowed bypass of senescence in cells predisposed to senescence; *Tbx2* is amplified in breast, ovarian and pancreatic cancer cells (Rowley et al., 2004). *Tbx2* can bypass senescence by direct repression of senescence genes. If *Tbx2* represses *Nmyc1* in cancer cells, consequences of this repression may depend on relative expression levels of *Tbx2* and *Nmyc1*. For example, high levels of *Nmyc1* can trigger senescence. Therefore moderate downregulation of *Nmyc1* by *Tbx2* in this context could bypass senescence, promoting immortalization. However, severe downregulation of *Nmyc1* by *Tbx2* could prevent proliferation, promoting differentiation and rendering transformation less likely. Bypass of senescence is a property of stem cells (Park et al., 2004). The ability of *Tbx2* to bypass senescence, either by targeting of senescence genes or downregulation of *Nmyc1* suggests that *Tbx2* might play a role in stem cell maintenance.

The T-box genes *Tbx2*, *Tbx3*, *Tbx4* and *Tbx5* are closely related, and may have arisen from an ancient duplication that gave rise to the precursor genes *Tbx2/3* and *Tbx4/5* (Agulnik et al., 1996). *Tbx2* and *Tbx3* are expressed in a partially overlapping manner during development, particularly in the heart. *Tbx2* knockout mice are embryonic lethal between E11.5 and E14.5, and exhibit morphological defects in outflow tract and in atrioventricular canal (Harrelson et al., 2004). No proliferative differences were observed in the heart of *Tbx2*-null mice and wild-type littermates, despite previous data demonstrating a role for *Tbx2* in cell cycle control. One potential reason for this is functional redundancy between *Tbx2* and *Tbx3*, as both have been shown to repress the same senescence genes, are amplified in breast cancer and cooperate with oncogenes to transform cells (Rowley et al., 2004). These observations suggest that *Tbx3* may also target *Nmyc1*. *Tbx3* is highly expressed in the developing central conduction system of the heart, a region characterized by low rates of proliferation (Hoogaars et al., 2004; Sedmera et al., 2003). *Tbx3* is mutated in ulnar mammary syndrome, where phenotypic defects may result from proliferative abnormalities (Bamshad et al., 1999); it will be of interest to examine the role of *Tbx3* and *Nmyc1* in this regard. Recent microarray analysis has demonstrated high levels of *Tbx3* expression in an *Ach* (adrenal corticotrophic hormone; *Pomc1* – Mouse Genome Informatics) -producing small cell lung carcinoma (Turney et al., 2004). Small cell lung carcinomas are associated with *Nmyc1* amplification. Investigating potential interactions between *Tbx3* and *Nmyc1* in this context is warranted.

*Tbx5* has been shown to exhibit antiproliferative activity in cardiomyocytes (Hatcher et al., 2001). A missense mutation that causes Holt-Oram syndrome can act in a dominant-negative fashion to counteract the antiproliferative activity of the wild-type gene. The close relationship of *Tbx2* and *Tbx5* suggest that perhaps *Tbx5* also can target the conserved T-box elements within the *Nmyc1* promoter. *Tbx5* is highly expressed in the atrioventricular canal and in the developing cardiac conduction system, regions of relatively low proliferative activity (Hoogaars et al., 2004).

In addition to their role in proliferation, *Tbx2* and *Tbx20* regulate genes that specify regional identity within the heart.

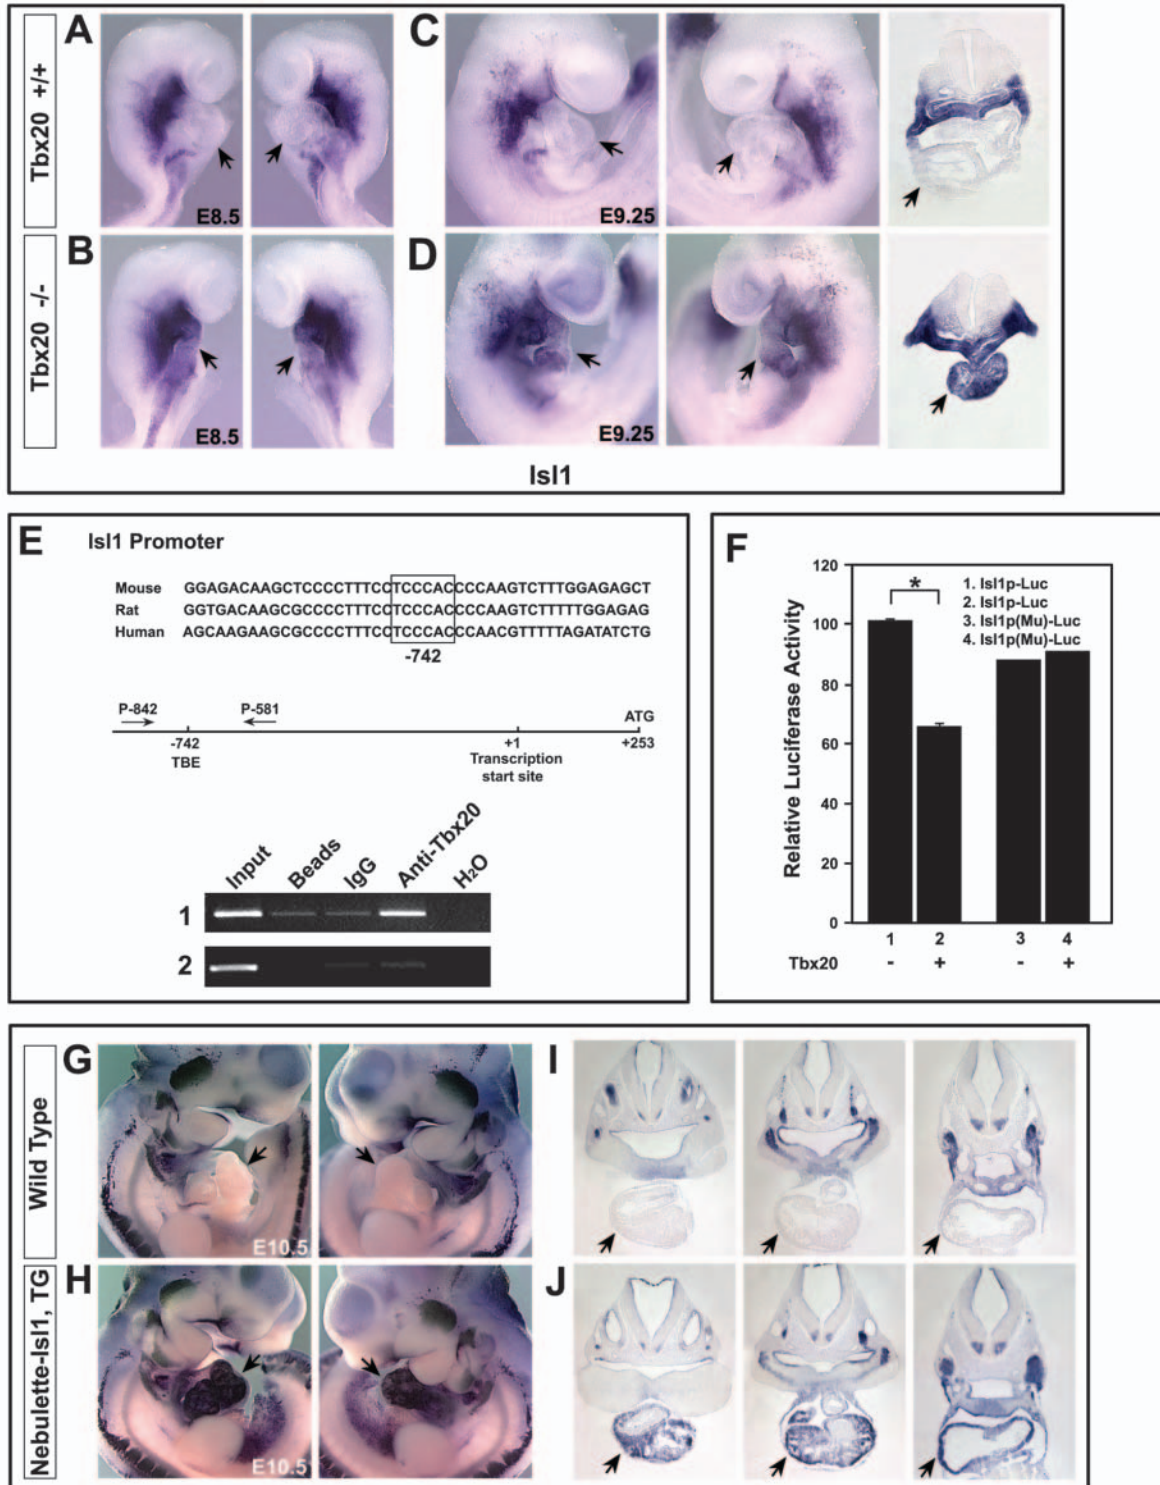

**Fig. 8.** Tbx20 directly binds and represses *Isl1* in myocardium. (A-D) *Isl1* is expressed throughout myocardium in *Tbx20* mutants. (E) ChIP analysis revealed Tbx20 recruitment to region of *Isl1* promoter with conserved T-box site (lane 1, primer P-842, P-581). ChIP analysis with primers against an unrelated promoter region revealed no Tbx20 recruitment (lane 2) (see Materials and methods for primers). No recruitment was found with beads, IgG or H<sub>2</sub>O. (F) Co-transfection of Tbx20 expression vector (500 ng) with *Isl1* promoter-luciferase reporter (100 ng) demonstrated repression of *Isl1* by Tbx20. Repression was abrogated by mutation of the consensus T-box element within the *Isl1* promoter. \* $P < 0.05$ , paired  $t$ -test. (G-J) The nebulette promoter, expressed exclusively in myocardium during early embryogenesis (J.C., unpublished) was used to drive expression of *Isl1* in transgenic mice. Whole-mount in situ hybridization (G,H) revealed expression of *Isl1* throughout myocardium in transgenic mice (H). Hearts of transgenics appeared normal at E10.5. The left and right images in A-D,G,H show right and left side views. Corresponding sections are shown progressively from anterior to posterior (C,D; I,J). Arrows indicate the corresponding heart regions in wild type and mutant embryos.

Loss-of-function studies have demonstrated that *Tbx2* is required in atrioventricular canal to repress expression of chamber-specific genes *Cited1*, *chisel* and *Nppa* (Harrelson et al., 2004). These chamber-specific genes are downregulated in  $\beta$ -MHC-*Tbx2* transgenics (Christoffels et al., 2004) and in *Tbx20* mutants, in which *Tbx2* is similarly upregulated throughout myocardium. *Tbx20*, however, may also be required to activate expression of chamber specific genes, as *Tbx20* and *Nkx2-5* can cooperatively activate the *Nppa* promoter in some cell contexts (Stennard et al., 2003). We have found two other regionally specific genes that appear to be regulated by *Tbx20* independently of *Tbx2*. Expression of  $\alpha$ -MHC is downregulated in *Tbx20* mutants, but is not affected in  $\beta$ -MHC-*Tbx2* transgenics; *Hand1* is downregulated in *Tbx20* mutants, but not affected in *Tbx2* knockouts. Another chamber-specific gene, *Irx4*, which is expressed in ventricular chamber myocardium, is downregulated in *Tbx20*-null mice but was not examined in  $\beta$ -MHC-*Tbx2* transgenics. Several genes that are downregulated in *Tbx20* mutants are downregulated in *Nkx2-5* (*Nppa*, *chisel*, *Cited1*, *Hand1*, *Irx4*) and/or *Tbx5* mutants (*Nppa*, *Irx4*) (Harvey, 2002), suggesting that *Tbx20*, *Nkx2-5* and *Tbx5* may cooperatively regulate a subset of downstream targets. Mutations in *Nkx2-5* and *Tbx5* cause congenital disease in humans (Seidman and Seidman, 2002), opening the possibility that causative mutations may also be found in *Tbx20*.

In addition to *Nmyc1*, two other downstream targets of *Tbx20*, *Hand1* and *Irx4*, give cardiac phenotypes in null mice, although their cardiac phenotypes are distinct from those of *Tbx20* mutants (Bruneau et al., 2000; Olson, 2004; Srivastava, 1999). These observations demonstrate that, in addition to the control of regional proliferation detailed here, *Tbx20* is required for other crucial aspects of heart development. Although both *Tbx20* and *Nmyc1* mutants have severely hypoplastic hearts, the cardiac phenotype in *Tbx20*-null mice is slightly more severe than that of *Nmyc1* mutant mice, suggesting that factors in addition to *Nmyc1* downregulation contribute to the phenotype.

Phenotypes observed following *Tbx20* morpholino injection into zebrafish or *Xenopus* embryos (Brown et al., 2005; Stennard et al., 2003; Szeto et al., 2002) support a conserved role for *Tbx20* in chamber morphogenesis and specification, although downstream targets may be species specific. In zebrafish, morphant hearts exhibit no distinction between chambers, and aberrantly express ventricular myosin heavy chain in atria. In contrast to our results with *Tbx20*-null mice, *Tbx5* is strongly upregulated in zebrafish *tbx20* morphants. Expression of *tbx5* in zebrafish differs from that in mouse, becoming restricted to ventricle, not atrium, suggesting species specific differences in the regulation of these genes. *Tbx20* morphant frogs also exhibit severe reduction in heart size. No downstream targets of *Tbx20* were identified in the frog experiments, and *XNppa* expression is unaffected in *Tbx20* morphants. Although *Tbx5* was not a target of *Tbx20* knockdown, combined injection of morpholinos against *Tbx5* and *Tbx20* synergistically affected heart development, suggesting concerted activity of these two transcription factors in cardiogenesis.

We are very grateful to Alexis Kleckner for her excellent technical assistance. We thank Sam Pfaff and Soo-Kyung Lee for providing us with *Tbx20* antibody prior to publication; and Sally Dunwoodie,

Antoon Moorman and Benoit Bruneau for providing probes for *Cited1*,  $\alpha$ -MHC,  $\beta$ -MHC and *Nppa*. We thank Vincent Christoffels for providing the *Tbx2* expression vector, and Lizhu Lin for suggestions on experimental methods. We are grateful to Bob Schwartz and Rolf Bodmer for discussions and providing data prior to publication, to Yunqing Shi for excellent animal husbandry, and Ella Kothari and Jun Zhao from UCSD Cancer Center Transgenic Mouse and Gene Targeting Core Facility for expertise in making knockout and transgenic mice. We also thank to Elise Lamar for critical reading of the manuscript. This work was supported by NIH 1RO1 to S.E. (HL070867), AHA Postdoctoral Fellowship to C.L.C. (0120023Y) and AHA National Scientist Development Grant to C.L.C. (0430385N).

## References

- Agulnik, S. I., Garvey, N., Hancock, S., Ruvinsky, I., Chapman, D. L., Agulnik, I., Bollag, R., Papaioannou, V. and Silver, L. M. (1996). Evolution of mouse T-box genes by tandem duplication and cluster dispersion. *Genetics* **144**, 249-254.
- Bamshad, M., Le, T., Watkins, W. S., Dixon, M. E., Kramer, B. E., Roeder, A. D., Carey, J. C., Root, S., Schinzel, A., van Maldergem, L. et al. (1999). The spectrum of mutations in TBX3: Genotype/Phenotype relationship in ulnar-mammary syndrome. *Am. J. Hum. Genet.* **64**, 1550-1562.
- Brown, D. D., Martz, S. N., Binder, O., Goetz, S. C., Price, B. M. J., Smith, J. C. and Conlon, F. L. (2005). *Tbx5* and *Tbx20* act synergistically to control vertebrate heart morphogenesis. *Development* **132**, 553-563.
- Brummelkamp, T. R., Kortlever, R. M., Lingbeek, M., Trettel, F., MacDonald, M. E., van Lohuizen, M. and Bernards, R. (2002). TBX-3, the gene mutated in Ulnar-Mammary Syndrome, is a negative regulator of p19ARF and inhibits senescence. *J. Biol. Chem.* **277**, 6567-6572.
- Bruneau, B. G., Bao, Z. Z., Tanaka, M., Schott, J. J., Izumo, S., Cepko, C. L., Seidman, J. G. and Seidman, C. E. (2000). Cardiac expression of the ventricle-specific homeobox gene *Irx4* is modulated by *Nkx2-5* and *dHand*. *Dev. Biol.* **217**, 266-277.
- Cai, C. L., Liang, X., Shi, Y., Chu, P. H., Pfaff, S. L., Chen, J. and Evans, S. (2003). *Isl1* identifies a cardiac progenitor population that proliferates prior to differentiation and contributes a majority of cells to the heart. *Dev. Cell* **5**, 877-889.
- Carlson, C. C., Burnham, L. L., Shanks, R. A. and Dransfield, D. T. (2001). 8-Cl-adenosine induces differentiation in LS174T cells. *Dig. Dis. Sci.* **46**, 757-764.
- Carlson, H., Ota, S., Song, Y., Chen, Y. and Hurlin, P. J. (2002). *Tbx3* impinges on the p53 pathway to suppress apoptosis, facilitate cell transformation and block myogenic differentiation. *Oncogene* **21**, 3827-3835.
- Carraway, K. L., 3rd (1996). Involvement of the neuregulins and their receptors in cardiac and neural development. *BioEssays* **18**, 263-266.
- Charron, J., Malynn, B. A., Fisher, P., Stewart, V., Jeannotte, L., Goff, S. P., Robertson, E. J. and Alt, F. W. (1992). Embryonic lethality in mice homozygous for a targeted disruption of the *N-myc* gene. *Genes Dev.* **6**, 2248-2257.
- Chaudhry, H. W., Dashoush, N. H., Tang, H., Zhang, L., Wang, X., Wu, E. X. and Wolgemuth, D. J. (2004). Cyclin A2 mediates cardiomyocyte mitosis in the postmitotic myocardium. *J. Biol. Chem.* **279**, 35858-35866.
- Chen, H., Shi, S., Acosta, L., Li, W., Lu, J., Bao, S., Chen, Z., Yang, Z., Schneider, M. D., Chien, K. R. et al. (2004). BMP10 is essential for maintaining cardiac growth during murine cardiogenesis. *Development* **131**, 2219-2231.
- Chi, C. L., Martinez, S., Wurst, W. and Martin, G. R. (2003). The isthmus organizer signal FGF8 is required for cell survival in the prospective midbrain and cerebellum. *Development* **130**, 2633-2644.
- Christoffels, V. M., Hoogaars, W. M., Tessari, A., Clout, D. E., Moorman, A. F. and Campione, M. (2004). T-box transcription factor *Tbx2* represses differentiation and formation of the cardiac chambers. *Dev. Dyn.* **229**, 763-770.
- Davis, A. and Bradley, A. (1993). Mutation of *N-myc* in mice: what does the phenotype tell us? *BioEssays* **15**, 273-275.
- de Jong, F., Ophhof, T., Wilde, A. A., Janse, M. J., Charles, R., Lamers, W. H. and Moorman, A. F. (1992). Persisting zones of slow impulse conduction in developing chicken hearts. *Circ. Res.* **71**, 240-250.

- Fan, W., Huang, X., Chen, C., Gray, J. and Huang, T. (2004). TBX3 and its isoform TBX3+2a are functionally distinctive in inhibition of senescence and are overexpressed in a subset of breast cancer cell lines. *Cancer Res.* **64**, 5132-5139.
- Harrelson, Z., Kelly, R. G., Goldin, S. N., Gibson-Brown, J. J., Bollag, R. J., Silver, L. M. and Papaioannou, V. E. (2004). Tbx2 is essential for patterning the atrioventricular canal and for morphogenesis of the outflow tract during heart development. *Development* **131**, 5041-5052.
- Harvey, R. P. (2002). Patterning the vertebrate heart. *Nat. Rev. Genet.* **3**, 544-556.
- Hatcher, C. J., Kim, M. S., Mah, C. S., Goldstein, M. M., Wong, B., Mikawa, T. and Basson, C. T. (2001). TBX5 transcription factor regulates cell proliferation during cardiogenesis. *Dev. Biol.* **230**, 177-188.
- Hensey, C. and Gautier, J. (1998). Programmed cell death during Xenopus development: a spatio-temporal analysis. *Dev. Biol.* **203**, 36-48.
- Hoogaars, W. M., Tessari, A., Moorman, A. F., de Boer, P. A., Hagoort, J., Soufan, A. T., Campione, M. and Christoffels, V. M. (2004). The transcriptional repressor Tbx3 delineates the developing central conduction system of the heart. *Cardiovasc. Res.* **62**, 489-499.
- Iio, A., Koide, M., Hidaka, K. and Morisaki, T. (2001). Expression pattern of novel chick T-box gene, Tbx20. *Dev. Genes Evol.* **211**, 559-562.
- Jacobs, J. J., Kehlusek, P., Robanus-Maandag, E., Kristel, P., Lingbeek, M., Nederlof, P. M., van Welseme, T., van de Vijver, M. J., Koh, E. Y., Daley, G. Q. et al. (2000). Senescence bypass screen identifies TBX2, which represses Cdkn2a (p19(ARF)) and is amplified in a subset of human breast cancers. *Nat. Genet.* **26**, 291-299.
- Kamijo, T., Zindy, F., Roussel, M. F., Quelle, D. E., Downing, J. R., Ashmun, R. A., Grosveld, G. and Sherr, C. J. (1997). Tumor suppression at the mouse INK4a locus mediated by the alternative reading frame product p19ARF. *Cell* **91**, 649-659.
- Kiefer, J. C. (2004). The Tbx-files: the truth is out there. *Dev. Dyn.* **231**, 232-236.
- Kim, R. Y., Robertson, E. J. and Solloway, M. J. (2001). Bmp6 and Bmp7 are required for cushion formation and septation in the developing mouse heart. *Dev. Biol.* **235**, 449-466.
- Kraus, F., Haenig, B. and Kispert, A. (2001). Cloning and expression analysis of the mouse T-box gene tbx20. *Mech. Dev.* **100**, 87-91.
- Lavine, K. J., Yu, K., White, A. C., Zhang, X., Smith, C., Partanen, J. and Ornitz, D. M. (2005). Endocardial and epicardial derived FGF signals regulate myocardial proliferation and differentiation in vivo. *Dev. Cell* **8**, 85-95.
- Lingbeek, M. E., Jacobs, J. J. and van Lohuizen, M. (2002). The T-box repressors TBX2 and TBX3 specifically regulate the tumor suppressor gene p14ARF via a variant T-site in the initiator. *J. Biol. Chem.* **277**, 26120-26127.
- Liu, W., Selever, J., Wang, D., Lu, M. F., Moses, K. A., Schwartz, R. J. and Martin, J. F. (2004). Bmp4 signaling is required for outflow-tract septation and branchial-arch artery remodeling. *Proc. Natl. Acad. Sci. USA* **101**, 4489-4494.
- Moens, C. B., Stanton, B. R., Parada, L. F. and Rossant, J. (1993). Defects in heart and lung development in compound heterozygotes for two different targeted mutations at the N-myc locus. *Development* **119**, 485-499.
- Murphy, M., Stinnakre, M. G., Senamaud-Beaufort, C., Winston, N. J., Sweeney, C., Kubelka, M., Carrington, M., Brechot, C. and Sobczak-Thépot, J. (1997). Delayed early embryonic lethality following disruption of the murine cyclin A2 gene. *Nat. Genet.* **15**, 83-86.
- Nagy, A., Gersenstein, M., Vintersten, K. and Behringer, R. (2003). *Manipulating the Mouse Embryo: A Laboratory Manual*. Cold Spring Harbor, NY: Cold Spring Harbor Laboratory Press.
- Negro, A., Brar, B. K. and Lee, K. F. (2004). Essential roles of Her2/erbB2 in cardiac development and function. *Recent Prog. Horm. Res.* **59**, 1-12.
- Niles, R. M. (2003). Vitamin A (retinoids) regulation of mouse melanoma growth and differentiation. *J. Nutr.* **133**, 282S-286S.
- O'Gorman, S., Dagenais, N. A., Qian, M. and Marchuk, Y. (1997). Protamine-Cre recombinase transgenes efficiently recombine target sequences in the male germ line of mice, but not in embryonic stem cells. *Proc. Natl. Acad. Sci. USA* **94**, 14602-14607.
- Olson, E. N. (2004). A decade of discoveries in cardiac biology. *Nat. Med.* **10**, 467-474.
- Packham, E. A. and Brook, J. D. (2003). T-box genes in human disorders. *Hum. Mol. Genet.* **12**, R37-R44.
- Park, I. K., Morrison, S. J. and Clarke, M. F. (2004). Bmi1, stem cells, and senescence regulation. *J. Clin. Invest.* **113**, 175-179.
- Pashmforoush, M., Lu, J. T., Chen, H., Amand, T. S., Kondo, R., Pradervand, S., Evans, S. M., Clark, B., Feramisco, J. R., Giles, W. et al. (2004). Nkx2-5 pathways and congenital heart disease; loss of ventricular myocyte lineage specification leads to progressive cardiomyopathy and complete heart block. *Cell* **117**, 373-386.
- Plageman, T. F., Jr and Yutzey, K. E. (2005). T-box genes and heart development: Putting the 'T' in heart. *Dev. Dyn.* **232**, 11-20.
- Prince, S., Carreira, S., Vance, K. W., Abrahams, A. and Goding, C. R. (2004). Tbx2 directly represses the expression of the p21(WAF1) cyclin-dependent kinase inhibitor. *Cancer Res.* **64**, 1669-1674.
- Rowley, M., Grothey, E. and Couch, F. J. (2004). The role of Tbx2 and Tbx3 in mammary development and tumorigenesis. *J. Mamm. Gland Biol. Neoplasia* **9**, 109-118.
- Rumyantsev, P. P. (1991). *Growth and Hyperplasia of Cardiac Muscle Cells*. London, UK: Harwood Publishers.
- Sawai, S., Shimono, A., Wakamatsu, Y., Palmes, C., Hanaoka, K. and Kondoh, H. (1993). Defects of embryonic organogenesis resulting from targeted disruption of the N-myc gene in the mouse. *Development* **117**, 1445-1455.
- Schulte, J. H., Schramm, A., Klein-Hitpass, L., Klenk, M., Wessels, H., Hauffa, B. P., Eils, J., Eils, R., Brodeur, G. M., Schweigerer, L. et al. (2005). Microarray analysis reveals differential gene expression patterns and regulation of single target genes contributing to the opposing phenotype of TrkA- and TrkB-expressing neuroblastomas. *Oncogene* **24**, 165-177.
- Sedmera, D., Reckova, M., DeAlmeida, A., Coppen, S. R., Kubalak, S. W., Gourdie, R. G. and Thompson, R. P. (2003). Spatiotemporal pattern of commitment to slowed proliferation in the embryonic mouse heart indicates progressive differentiation of the cardiac conduction system. *Anat. Rec. A Discov. Mol. Cell Evol. Biol.* **274**, 773-777.
- Seidman, J. G. and Seidman, C. (2002). Transcription factor haploinsufficiency: when half a loaf is not enough. *J. Clin. Invest.* **109**, 451-455.
- Sherr, C. J. and Weber, J. D. (2000). The ARF/p53 pathway. *Curr. Opin. Genet. Dev.* **10**, 94-99.
- Solloway, M. J. and Robertson, E. J. (1999). Early embryonic lethality in Bmp5;Bmp7 double mutant mice suggests functional redundancy within the 60A subgroup. *Development* **126**, 1753-1768.
- Srivastava, D. (1999). Developmental and genetic aspects of congenital heart disease. *Curr. Opin. Cardiol.* **14**, 263-268.
- Stennard, F. A., Costa, M. W., Elliott, D. A., Rankin, S., Haast, S. J., Lai, D., McDonald, L. P., Niederreither, K., Dolle, P., Bruneau, B. G. et al. (2003). Cardiac T-box factor Tbx20 directly interacts with Nkx2-5, GATA4, and GATA5 in regulation of gene expression in the developing heart. *Dev. Biol.* **262**, 206-224.
- Strieder, V. and Lutz, W. (2002). Regulation of N-myc expression in development and disease. *Cancer Lett.* **180**, 107-119.
- Szeto, D. P., Griffin, K. J. and Kimelman, D. (2002). HrT is required for cardiovascular development in zebrafish. *Development* **129**, 5093-5101.
- Thiele, C. J., Reynolds, C. P. and Israel, M. A. (1985). Decreased expression of N-myc precedes retinoic acid-induced morphological differentiation of human neuroblastoma. *Nature* **313**, 404-406.
- Turney, M. K., Nicholson, W. E. and Kovacs, W. J. (2004). Gene expression phenotyping of an ACTH-producing small cell lung cancer line. *Mol. Cell Endocrinol.* **219**, 105-113.
- Vance, K. W. and Goding, C. R. (2004). The transcription network regulating melanocyte development and melanoma. *Pigment Cell Res.* **17**, 318-325.
- Wilkinson, D. G. (1992). *In Situ Hybridization: A Practical Approach*. New York: Oxford University Press.
- Xu, H., Morishima, M., Wylie, J. N., Schwartz, R. J., Bruneau, B. G., Lindsay, E. A. and Baldini, A. (2004). Tbx1 has a dual role in the morphogenesis of the cardiac outflow tract. *Development* **131**, 3217-3227.
- Yamada, M., Revelli, J. P., Eichele, G., Barron, M. and Schwartz, R. J. (2000). Expression of chick Tbx-2, Tbx-3, and Tbx-5 genes during early heart development: evidence for BMP2 induction of Tbx2. *Dev. Biol.* **228**, 95-105.
- Yamamoto, Y. and Henderson, C. E. (1999). Patterns of programmed cell death in populations of developing spinal motoneurons in chicken, mouse, and rat. *Dev. Biol.* **214**, 60-71.
- Zhang, H. and Bradley, A. (1996). Mice deficient for BMP2 are nonviable and have defects in amnion/chorion and cardiac development. *Development* **122**, 2977-2986.
- Zimmerman, K., Legouy, E., Stewart, V., Depinho, R. and Alt, F. W. (1990). Differential regulation of the N-myc gene in transfected cells and transgenic mice. *Mol. Cell Biol.* **10**, 2096-2103.
